# Supplementary material for: Measles Outbreak with Unique Virus Genotyping, Ontario, Canada, 2015
Source: PubMed Central journal article supplement (PMC5512469; doi:10.3201/eid2307.161145), 2017-07
Supplement: 16-1145-Techapp-s1.pdf [file 16-1145-Techapp-s1.pdf]

# Measles Outbreak with Unique Virus Genotyping, Ontario, Canada, 2015

## Technical Appendix

### Case Definitions

Ontario measles case definition: cases with laboratory confirmation of infection with clinically compatible signs and symptoms in the absence of recent immunization with measles-containing vaccine, or clinically compatible signs and symptoms in cases that were epidemiologically linked to a laboratory-confirmed case (*I*). Laboratory confirmation consists of any of the following: positive measles virus culture; positive direct nucleic acid amplification test for wild type measles virus RNA; seroconversion or a significant rise in measles Immunoglobulin G (IgG) titer between acute and convalescent sera; or positive for measles Immunoglobulin M (IgM) antibody and an epidemiologic link to a laboratory confirmed case or a positive travel history. A probable case of measles is a case with clinically compatible signs and symptoms in the absence of recent immunization with measles-containing vaccine and positive (IgM) serology testing, or clinically compatible signs and symptoms in a person who has traveled to an area of known measles activity (*I*).

### Outbreak Case Definition (Implemented February 20, 2015)

Confirmed or probable cases with rash onset dates between January 25, 2015 and March 23, 2015, residing in Toronto or Niagara region, or who were epidemiologically linked to confirmed measles cases in these health units and had no other known source.

### Reference

1. Ontario Ministry of Health and Long-Term Care Infectious Diseases. Ontario Ministry of Health and Long-Term Care Infectious Diseases protocol appendix B [cited 2015 Dec 7]. [http://www.health.gov.on.ca/en/pro/programs/publichealth/oph\\_standards/docs/measles\\_cd.pdf](http://www.health.gov.on.ca/en/pro/programs/publichealth/oph_standards/docs/measles_cd.pdf)

**Technical Appendix Table.** Primers used for the amplification and sequencing of the MF-NCR region

| Primer    | Primer Sequence 5'-3'           | Amplicon size |
|-----------|---------------------------------|---------------|
| MeV4200f  | GGC ACC AGT CTT CAC ATT AGA AG  | 1,409         |
| MeV5609r  | CGA GTC ATA ACT TTG TAG CCT GC  |               |
| MeV4200f  | GGC ACC AGT CTT CAC ATT AGA AG  | 669           |
| MeV4869r  | CTT GGC CCT RAG TTT TGT TTA G   |               |
| MeV4801f  | CAC AAG CGA CCG AGG TGA C       | 808           |
| MeV5609r  | CGA GTC ATA ACT TTG TAG CCT GC  |               |
| MeV4409*  | CAT AAA TGA TGA CCA AGG AC      |               |
| MeV4428r* | GTC CTT GGT CAT CAT TTA TG      |               |
| MeV4826r* | GTT GGG TCA CCT CGG TCG         |               |
| MeV5126f* | CAC ACA CSA CCA CGG CAA CC      |               |
| MeV5145r* | GGT TGC CGT GGT SGT GTG TG      |               |
| MVN 1109  | GCT ATG CCA TGG GAG TAG GAG TGG | 590           |
| MVN 1698R | GGC CTC TCG CAC CTA GTC TAG     |               |

\*Sequencing primers
